# Supplementary material for: Engineering a multi-biofunctional composite using poly(ethylenimine) decorated graphene oxide for bone tissue regeneration
Source: Royal Society of Chemistry journal article supplement (doi:10.1039/c5nr06906h), 2016-01-01
Supplement: c5nr06906h1.pdf [file c5nr06906h1.pdf]

**Supplementary Information for**

**Engineering a Multi-biofunctional Composite Using Poly(ethyleneimine)  
Decorated Graphene Oxide for Bone Tissue Regeneration**

Sachin Kumar<sup>1</sup>, Shammy Raj<sup>1</sup>, Kishor Sarkar<sup>2</sup>, Kaushik Chatterjee<sup>\*1</sup>

<sup>1</sup>Department of Materials Engineering and <sup>2</sup>Department of Chemical Engineering

Indian Institute of Science, Bangalore 560012 India

*\* author to whom all correspondence should be addressed*

Email: [kchatterjee@materials.iisc.ernet.in](mailto:kchatterjee@materials.iisc.ernet.in)

Tel: +91-80-22933408

**Table S1:** XPS elemental quantification of GO, GO-g-PAA and GO\_PEI

| Sample   | C 1s atomic (%) | N 1s atomic (%) | O 1s atomic (%) |
|----------|-----------------|-----------------|-----------------|
| GO       | 67.9            | 0               | 32.1            |
| GO-g-PAA | 59.8            | 0               | 40.2            |
| GO_PEI   | 52.8            | 20.7            | 26.5            |

**Table S2:** Average roughness (Ra) measured by optical profilometry and modulus determined by DMA

| Sample       | Roughness ( $R_a$ ) ( $\mu\text{m}$ ) | Storage Modulus (MPa) |
|--------------|---------------------------------------|-----------------------|
| PCL          | 0.46                                  | $374 \pm 29$          |
| PCL/GO_1     | 0.49                                  | $421 \pm 56$          |
| PCL/GO_3     | 0.51                                  | $503 \pm 38$          |
| PCL/GO_5     | 0.51                                  | $605 \pm 43$          |
| PCL/GO_PEI_1 | 0.50                                  | $406 \pm 12$          |
| PCL/GO_PEI_3 | 0.51                                  | $435 \pm 31$          |
| PCL/GO_PEI_5 | 0.52                                  | $492 \pm 17$          |

**Figure S1**

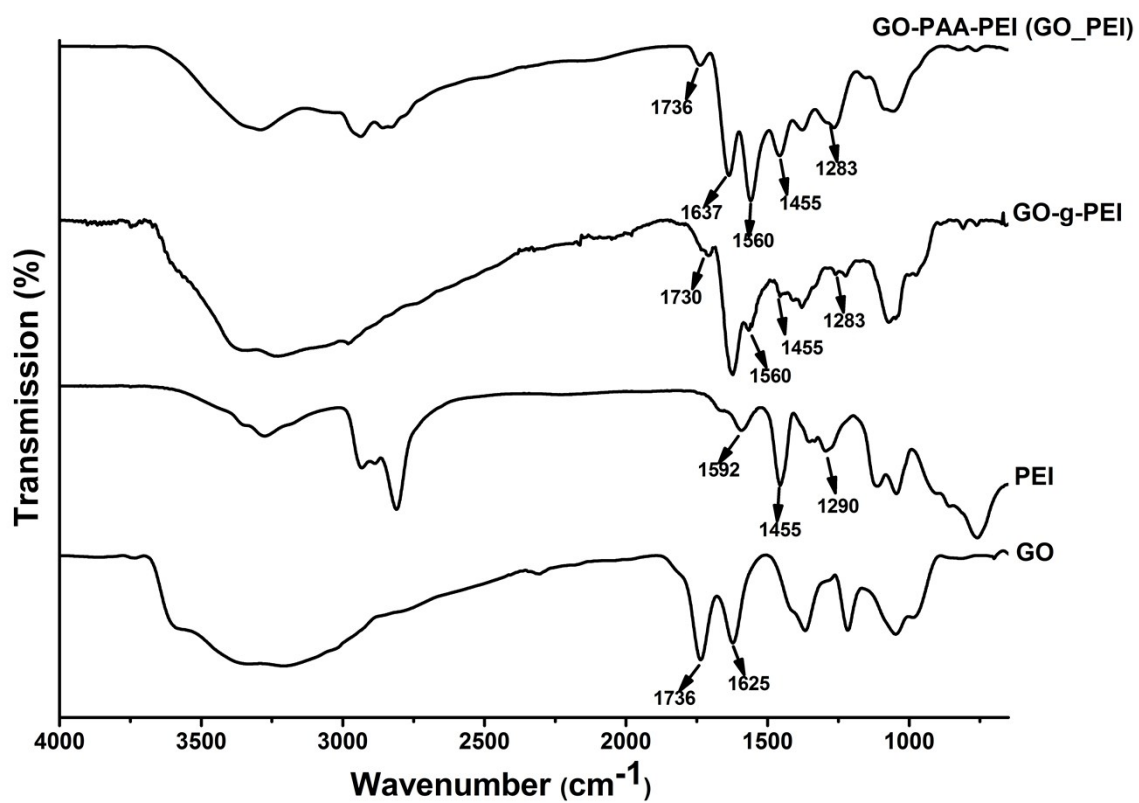

**Figure S1:** FTIR spectra of GO, PEI, GO-g-PEI (grafting of PEI directly on GO) and GO-PEI (PEI grafted on GO-g-PAA)

**Figure S2**

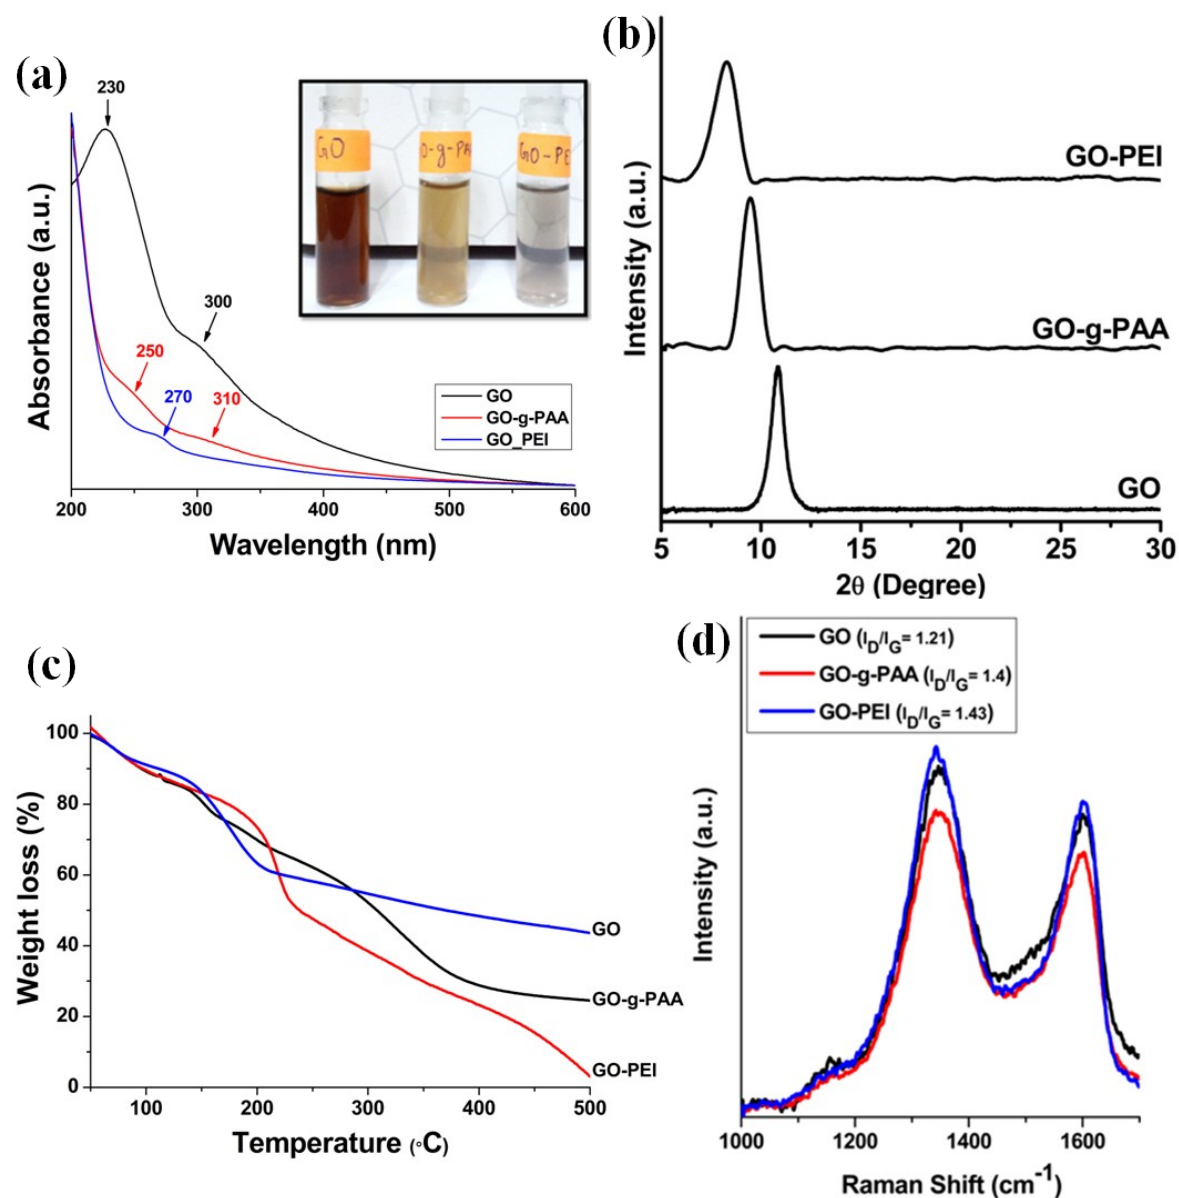

**Figure S2:** (a) UV-Vis spectra with inset showing digital photographs of aqueous dispersions of GO, GO-g-PAA and GO-PEI nanoparticles (b) XRD profiles of GO, GO-g-PAA and GO-PEI nanoparticles, (c) TGA thermographs of GO, GO-g-PAA and GO-PEI and (d) Raman spectra of GO, GO-g-PAA and GO-PEI

**Figure S3**

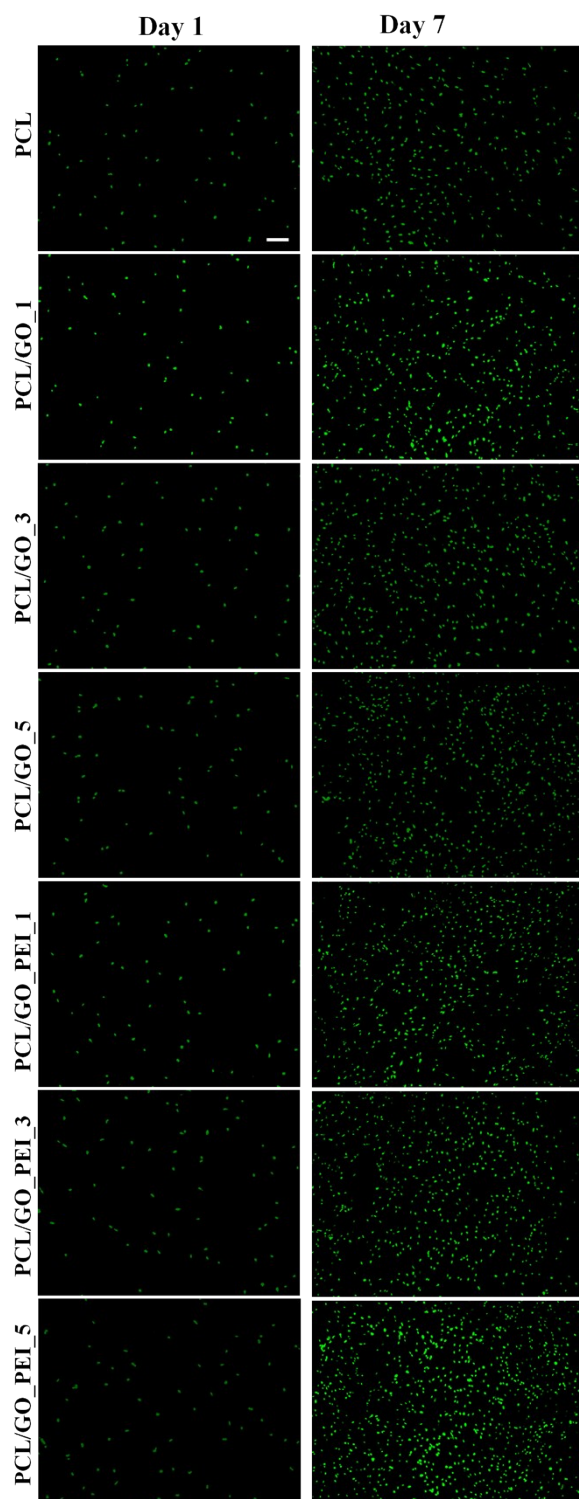

**Figure S3:** Fluorescence micrographs of stained nuclei of hMSCs at days 1 and 7 on neat PCL and its different composites (scale bar = 200  $\mu$ m) (False colored with green for DAPI for enhanced clarity)

**Figure S4**

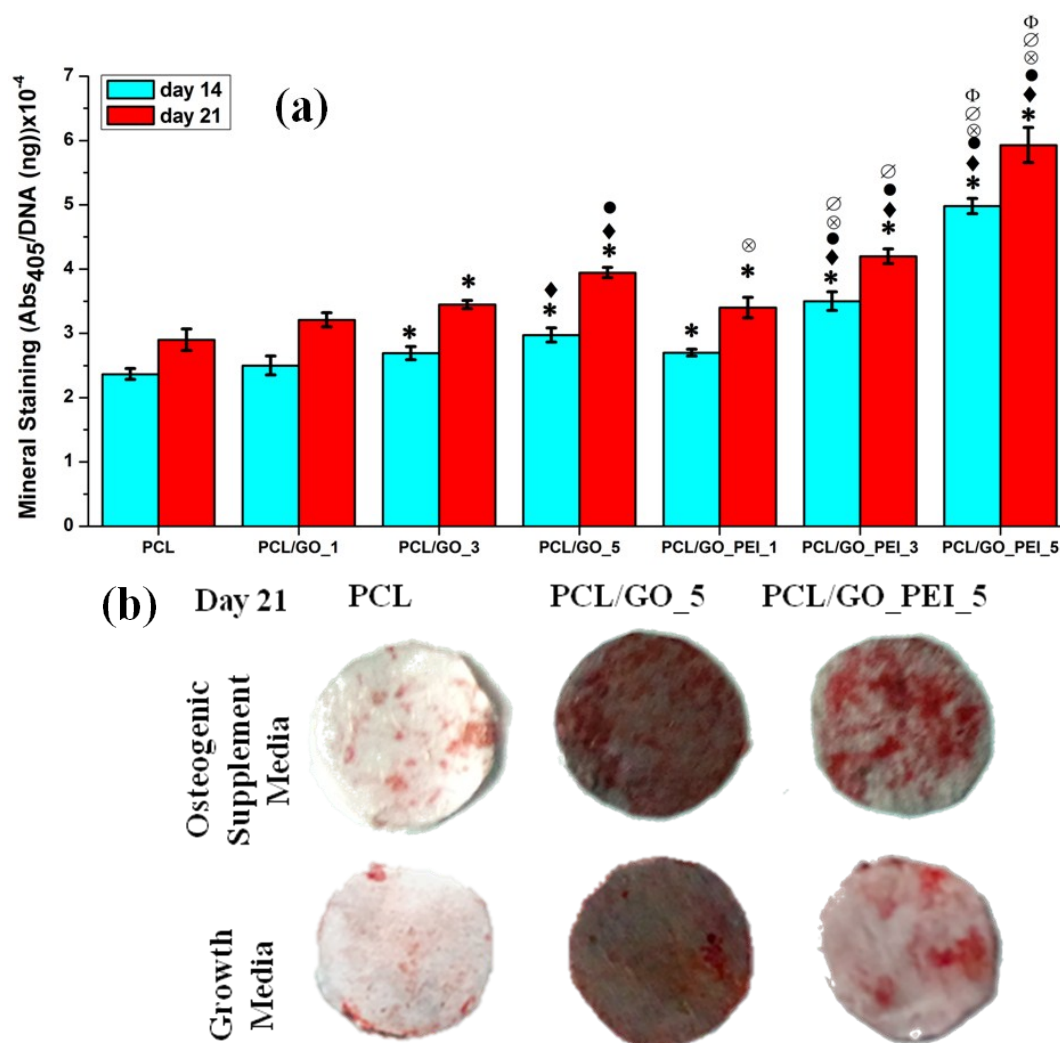

**Figure S4:** (a) Mineralization of hMSCs on PCL and its different composites in the presence of osteogenic supplements as day 14 and 21 and (b) representative digital photographs of ARS stained (red) surfaces of PCL, PCL/GO\_5 and PCL/GO\_PEI\_5 films at day 21 in the presence and absence of osteogenic supplements. Statistically significant differences ( $p < 0.05$ ) compared to PCL, PCL/GO\_1, PCL/GO\_3, PCL/GO\_5, PCL/GO\_PEI\_1 and PCL/GO\_PEI\_3, are indicated by \*, ♦, ●, ⊗, ∅ and Φ, respectively.

**Figure S5**

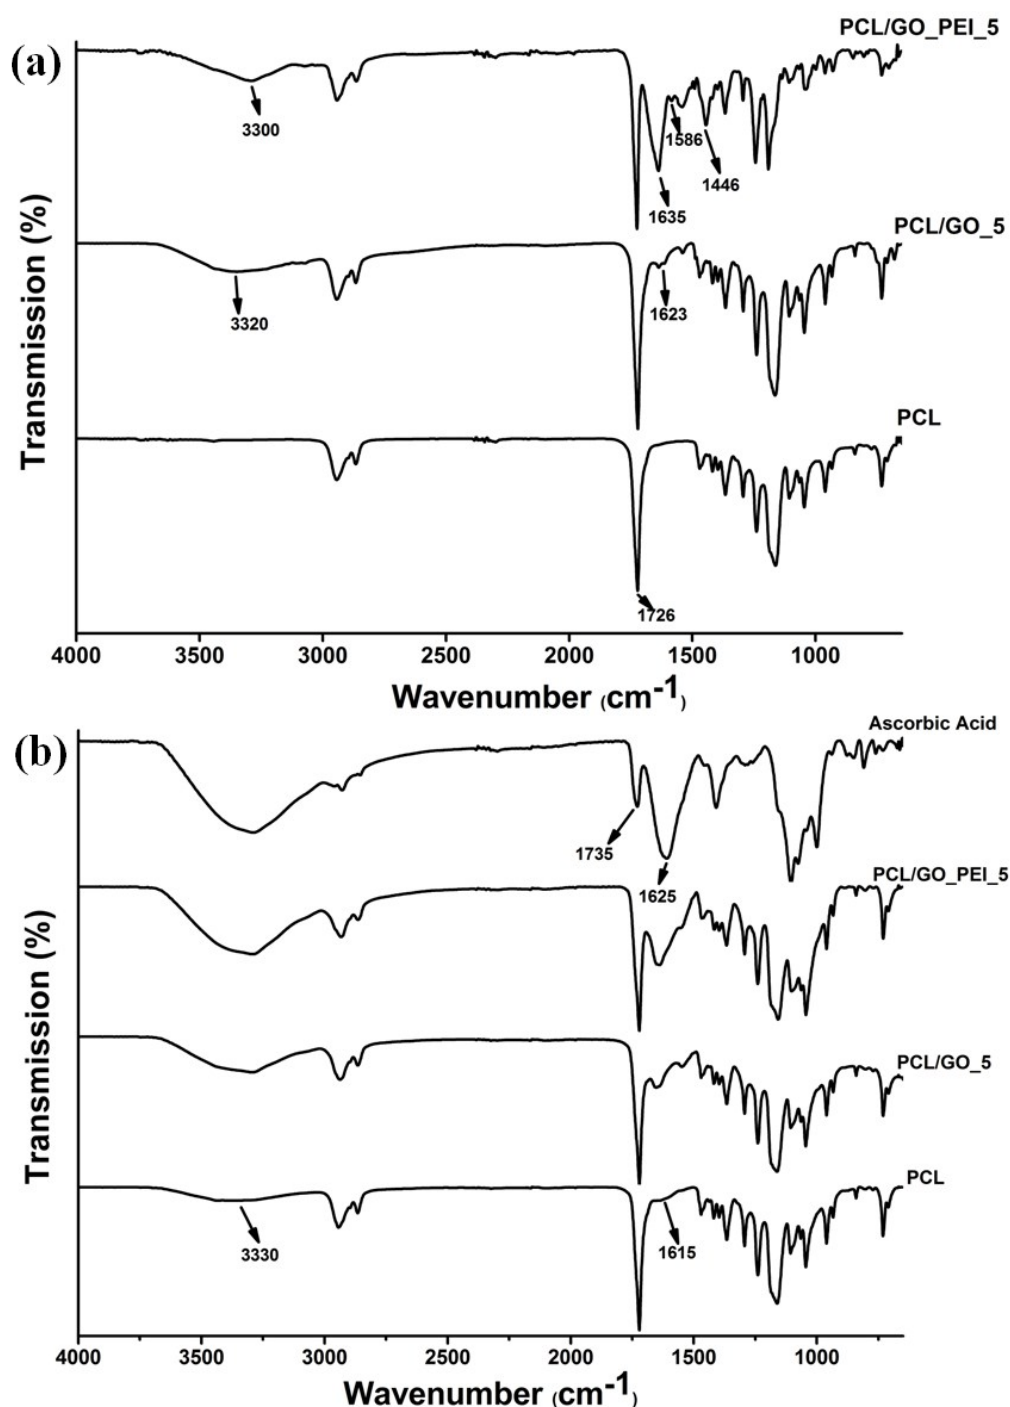

**Figure S5:** Attenuated total reflection mode FTIR (ATR-FTIR) spectra of PCL, PCL/GO\_5 and PCL/GO\_PEI\_5 before (a) and after (b) adsorption of ascorbic acid for 3 days. Neat PCL film showed intense peak at 1726  $\text{cm}^{-1}$  that may be attributed to the ester group of PCL. PCL/GO\_5 composite showed the peaks for PCL along with two additional peaks at 3320  $\text{cm}^{-1}$  and 1623  $\text{cm}^{-1}$  arising from  $-\text{OH}$  and  $\text{C}=\text{C}$  vibration of aromatic chains on GO. PCL/GO\_PEI\_5 showed all the peaks for PCL along with few new peaks at 3300  $\text{cm}^{-1}$ , 1635  $\text{cm}^{-1}$ , 1586  $\text{cm}^{-1}$  and 1446  $\text{cm}^{-1}$  corresponding to the  $-\text{OH}$ ,  $-\text{NH}$  and  $-\text{CH}$  groups from

GO\_PEI. These new peaks in PCL/GO\_5 and PCL/GO\_PEI\_5 composites films confirm the presence of GO and GO\_PEI particles in PCL matrix.

The spectra for ascorbic acid showed broad –OH stretching peak at  $3325\text{ cm}^{-1}$ . Peaks at  $1735\text{ cm}^{-1}$  and  $1625\text{ cm}^{-1}$  can be attributed C=O and C=C vibrational stretching from the five-membered lactone ring of ascorbic acid. The PCL film after adsorption showed peaks at  $3330\text{ cm}^{-1}$  and  $1615\text{ cm}^{-1}$  which were absent for neat PCL. Ascorbic acid adsorbed on PCL/GO\_5 showed intense and broad –OH stretching peak. Furthermore, the peak at around  $1630\text{ cm}^{-1}$  also became intense in comparison to the PCL/GO\_5 surface without ascorbic acid. Ascorbic acid adsorbed on PCL/GO\_PEI\_5 films showed much more intense and broader peaks among all the three samples at  $3320\text{ cm}^{-1}$  and  $1635\text{ cm}^{-1}$ . PCL/GO and PCL/GO\_PEI composites showing intense and broadness in peaks at  $3330\text{ cm}^{-1}$  and  $1635\text{ cm}^{-1}$  similar to that of ascorbic acid suggesting adsorption of ascorbic acid increases due to hydrogen bonding with GO and GO\_PEI. Intermolecular interaction through hydrogen bonds generally leads to broadening and stronger –OH stretching intensity. Thus, ATR-FTIR further confirms more surface adsorption of ascorbic acid on PCL/GO\_5 and PCL/GO\_PEI\_5 composites.



**Figure S6**

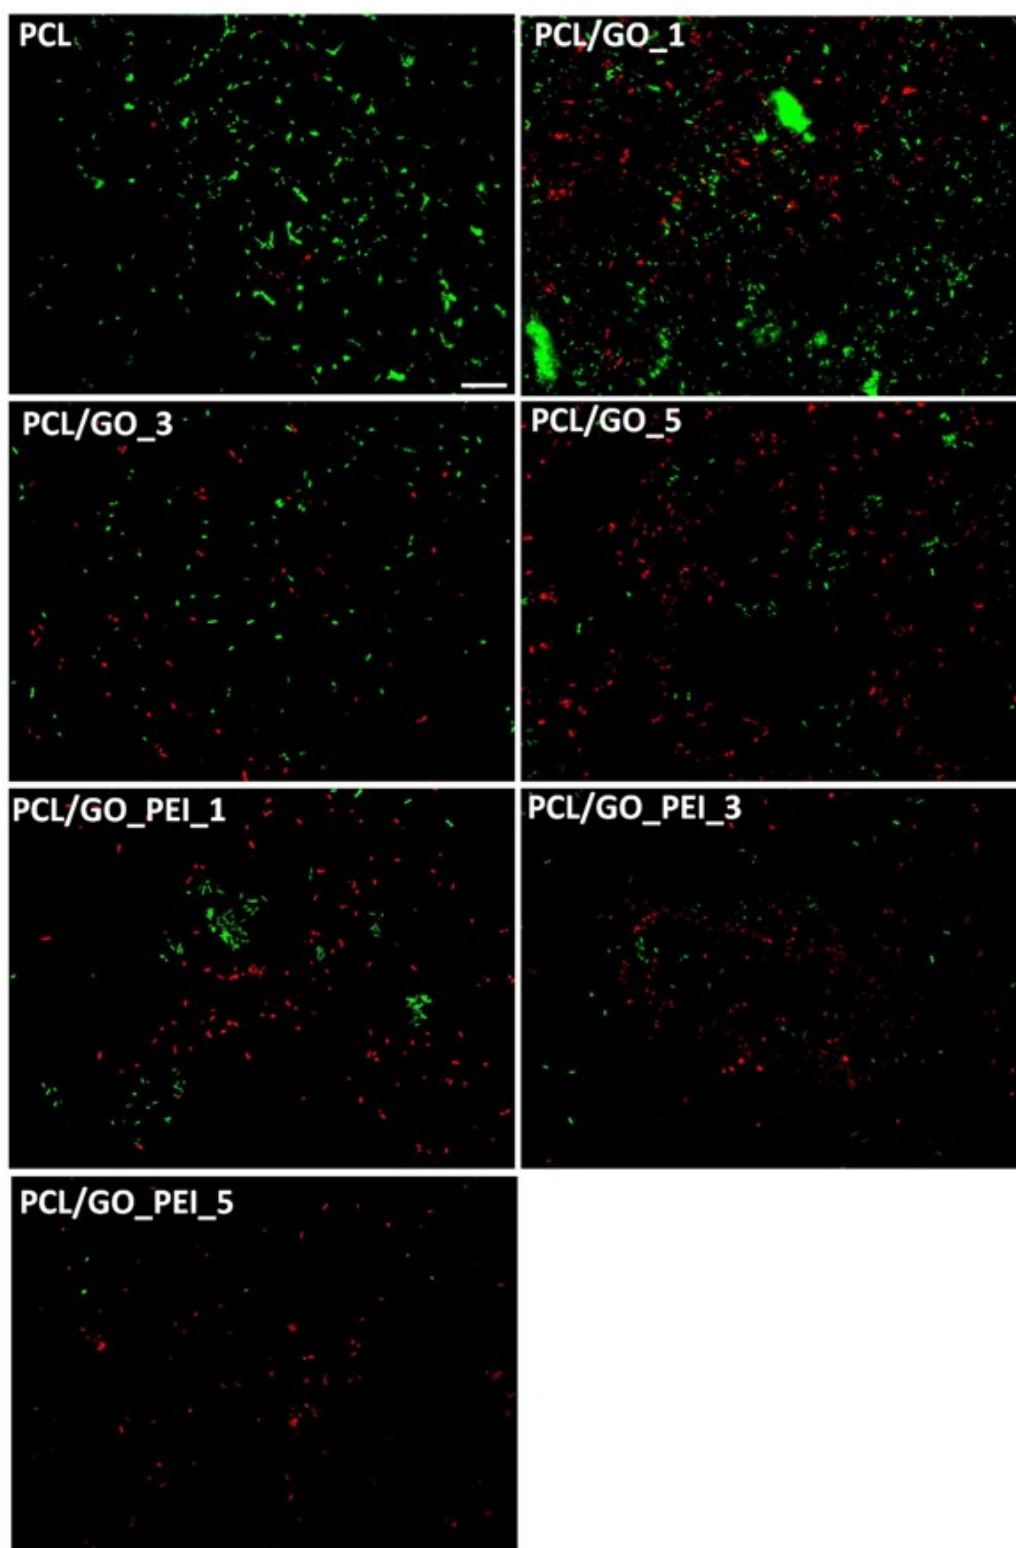

**Figure S6:** Fluorescence micrographs of *E. coli* stained for live/dead imaging on PCL and the different composites (scale bar = 25  $\mu\text{m}$ )

**Figure S7**

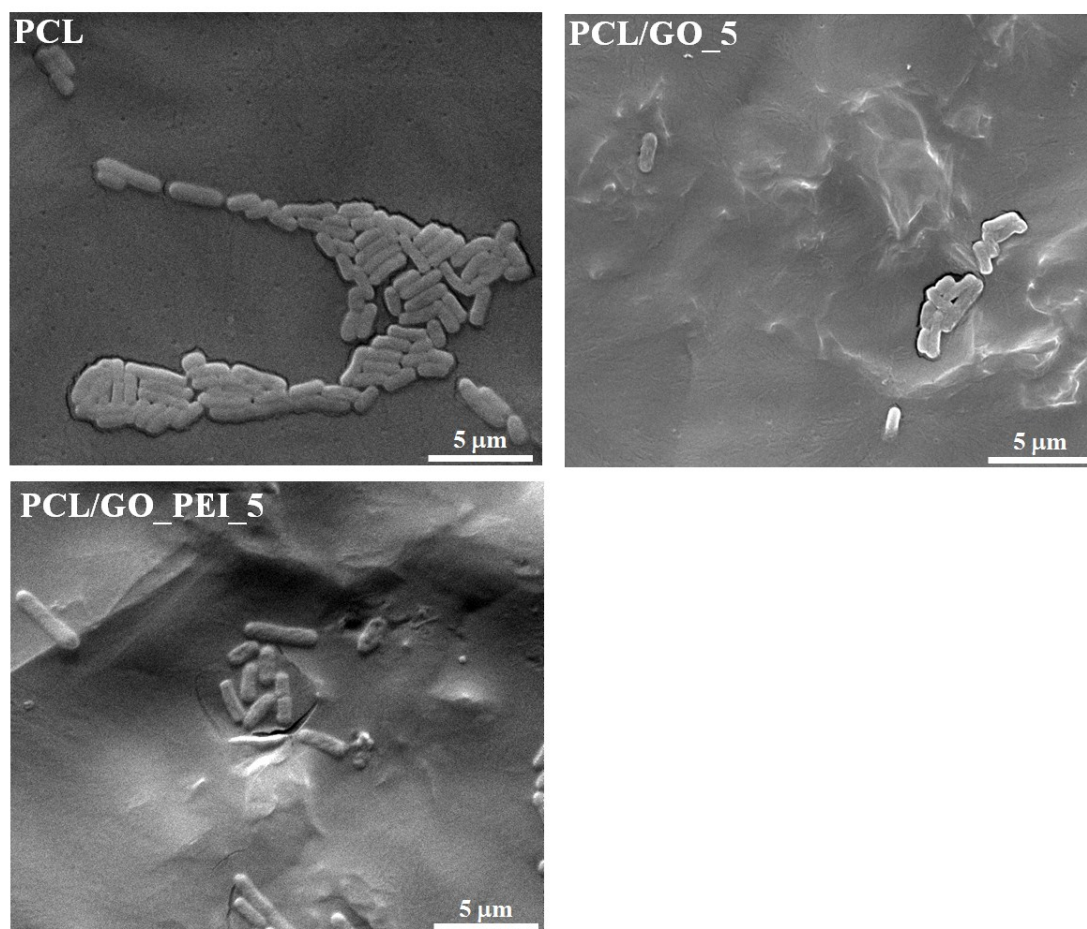

**Figure S7:** SEM micrographs of bacterial cells on PCL, PCL/GO\_5 and PCL/GO\_PEI\_5
